# Supplementary material for: Electrochemical reaction behavior of MnS in aqueous zinc ion battery
Source: Royal Society of Chemistry journal article supplement (doi:10.1039/d1qi01659h), 2022-01-01
Supplement: d1qi01659h1.pdf [file d1qi01659h1.pdf]

**Supporting Information**

**Electrochemical reaction behavior of MnS in aqueous zinc ion battery**

Shujun Xu,<sup>‡</sup><sup>a</sup> Siwei Fan,<sup>‡</sup><sup>a</sup> Wenqing Ma,<sup>a,b,\*</sup> Jiabao Fan<sup>a</sup> and Guangda Li<sup>a,\*</sup>

<sup>a</sup> School of Materials Science and Engineering, Energy Research Institute of Shandong Academy of Sciences, State Key Laboratory of Biobased Material and Green Papermaking, Qilu University of Technology (Shandong Academy of Sciences), Jinan 250353, P. R. China. E-mail: ligd@qlu.edu.cn

<sup>b</sup> Tianjin Key Laboratory of Advanced Functional Porous Materials, Institute for New Energy Materials and Low-Carbon Technologies, School of Materials Science and Engineering, Tianjin University of Technology, Tianjin 300384, P. R. China.

\* Wenqing Ma. E-mail: wqma@qlu.edu.cn (WQM).

\* Guangda Li. E-mail: ligd@qlu.edu.cn (GDL).

|                                                                                                                                                                                                             |     |
|-------------------------------------------------------------------------------------------------------------------------------------------------------------------------------------------------------------|-----|
| <b>Figure S1.</b> XRD pattern of the lab-prepared Mn-based organometallic precursor. ....                                                                                                                   | S1  |
| <b>Figure S2.</b> TGA of MnS/C. ....                                                                                                                                                                        | S2  |
| <b>Figure S3.</b> (a, b) SEM images of the MnS/C. The scale bar is 1 $\mu\text{m}$ . ....                                                                                                                   | S3  |
| <b>Figure S4.</b> (a-d) TEM images of the MnS/C. The scale bar is 1 $\mu\text{m}$ . ....                                                                                                                    | S4  |
| <b>Figure S5.</b> The time-dependent TEM images of the lab-prepared Mn-based organometallic precursor collected at different times: (a) 2, (b) 4, (c) 6, (d) 8, and (e) 10 h. The scale bar is 500 nm. .... | S5  |
| <b>Figure S6.</b> (a) SEM image and its corresponding line scan EDS elemental mapping results of (b) C, (c) Mn, and (d) S. ....                                                                             | S6  |
| <b>Figure S8.</b> Rate capabilities of MnS/C electrodes. ....                                                                                                                                               | S8  |
| <b>Figure S9.</b> Galvanostatic charge/discharge curves of MnS/C electrode. ....                                                                                                                            | S9  |
| <b>Figure S10.</b> Charge and discharge curves at different cycles at 100 $\text{mA g}^{-1}$ . ....                                                                                                         | S10 |
| <b>Figure S11.</b> SEM images of MnS/C electrode after cycling. (a) 1st, (b) 2 nd, (c) 20 th, (d) 1000 th. ....                                                                                             | S11 |
| <b>Figure S12.</b> The capacitive contribution ratio of MnS/C at different scan rates: (a) 0.1, (b) 0.4, (c) 0.5, and (d) 0.7 $\text{mV s}^{-1}$ . ....                                                     | S12 |
| <b>Figure S13.</b> The typical voltage evolution in a single titration in region (a) I and (b) II. ....                                                                                                     | S13 |

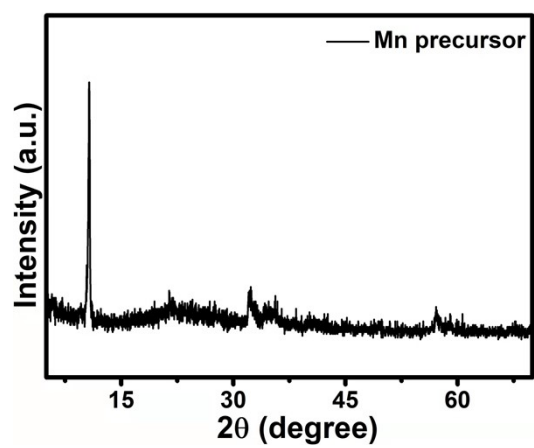

**Figure S1.** XRD pattern of the prepared Mn-based organometallic precursor.

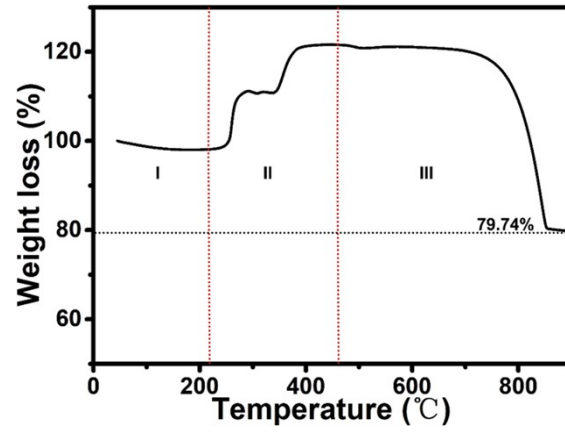

**Figure S2.** TGA of MnS/C.

MnS content in MnS/C composite:  $x$

$$x = \frac{79.74\% \times 2M_{MnS}}{M_{Mn_2O_3}} \quad x = 87.93\%$$

C content in MnS/C composite:  $y$

$$y = 100 - x \quad y = 12.07\%$$

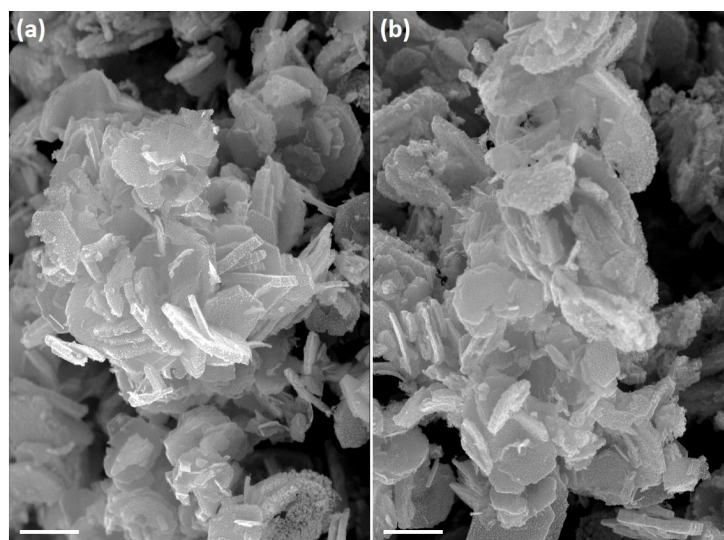

**Figure S3.** (a, b) SEM images of the MnS/C. The scale bar is 1  $\mu\text{m}$ .

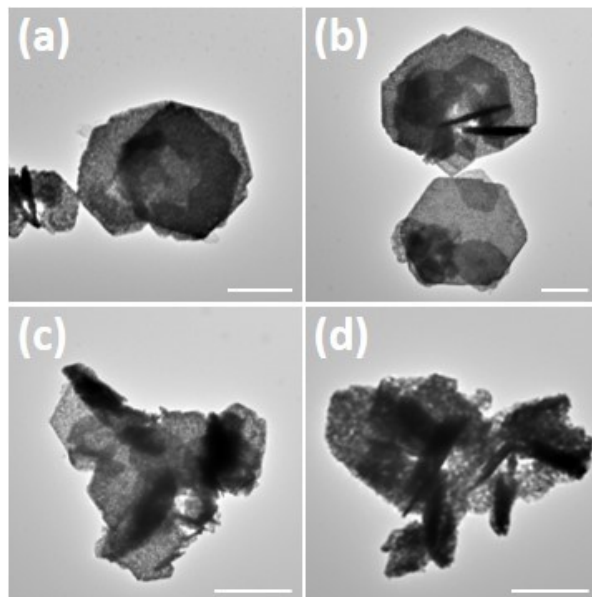

**Figure S4.** (a-d) TEM images of the MnS/C. The scale bar is 1  $\mu\text{m}$ .

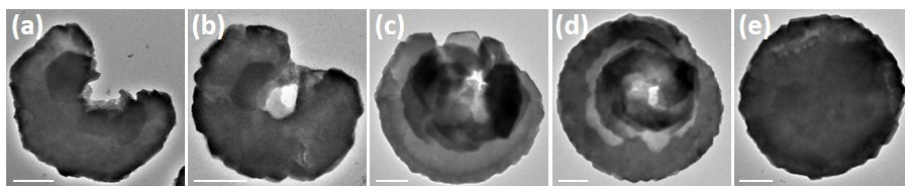

**Figure S5.** The time-dependent TEM images of the lab-prepared Mn-based organometallic precursor collected at different times: (a) 2, (b) 4, (c) 6, (d) 8, and (e) 10 h. The scale bar is 500 nm.

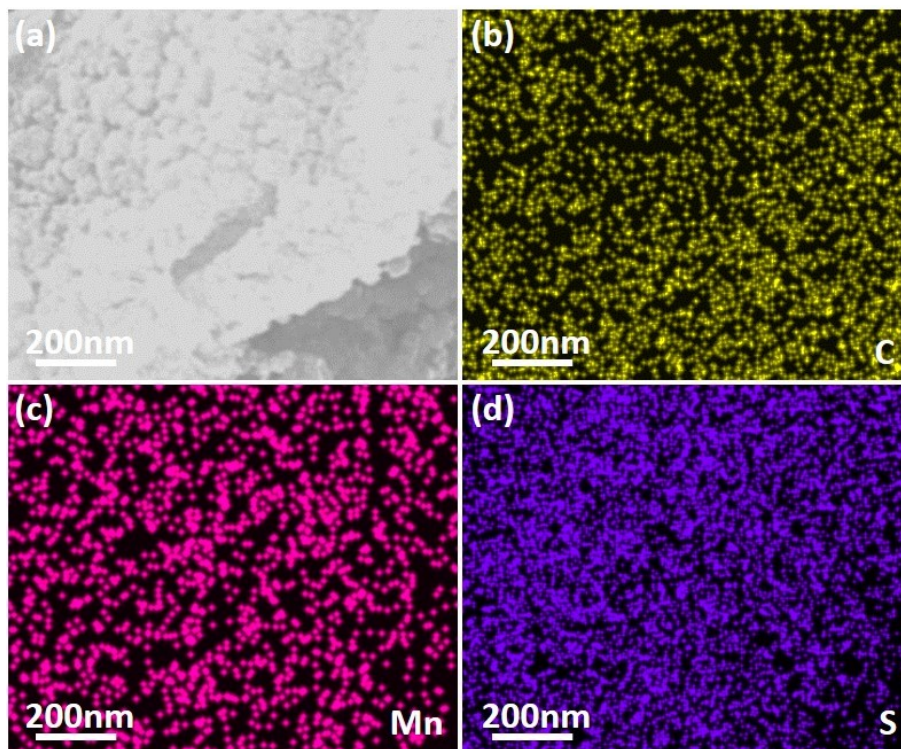

**Figure S6.** (a) SEM image and its corresponding line scan EDS elemental mapping results of (b) C, (c) Mn, and (d) S.



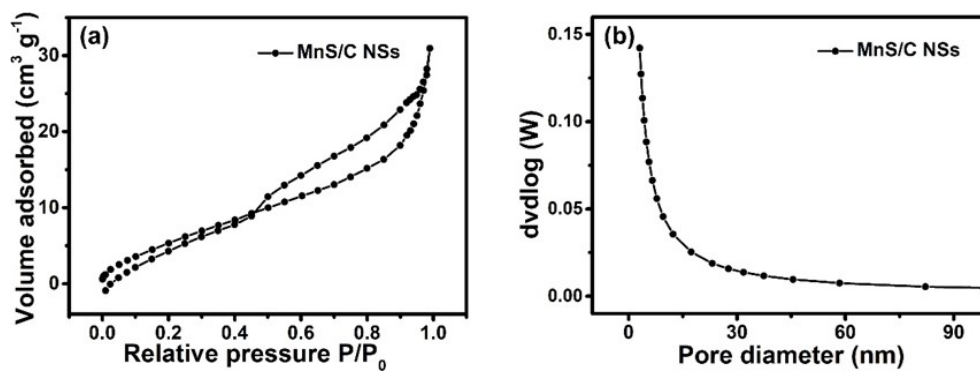

**Figure S7.** (a) N<sub>2</sub> adsorption-desorption isotherm of MnS/C composite. (b) pore size distribution of hollow MnS/C.

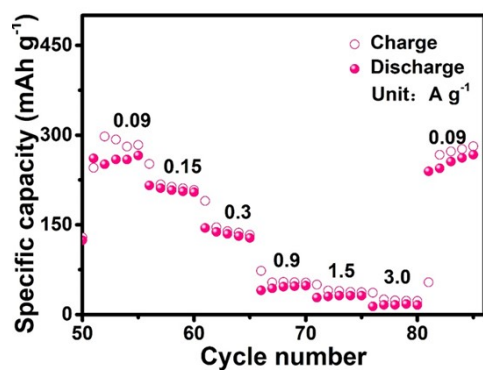

Figure S8. Rate capabilities of MnS/C electrodes.

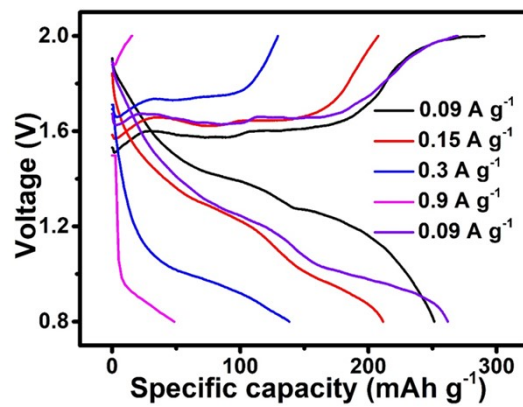

**Figure S9.** Galvanostatic charge/discharge curves of MnS/C electrode.

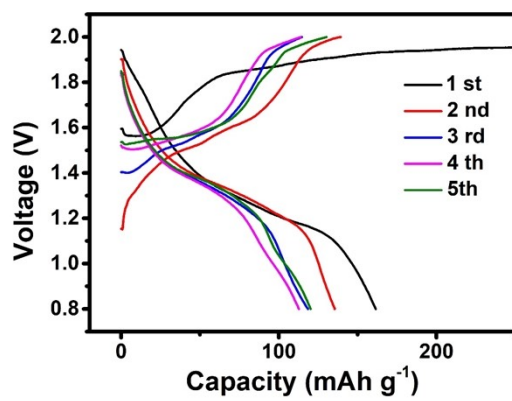

**Figure S10.** Charge and discharge curves at different cycles at 100 mA g<sup>-1</sup>.

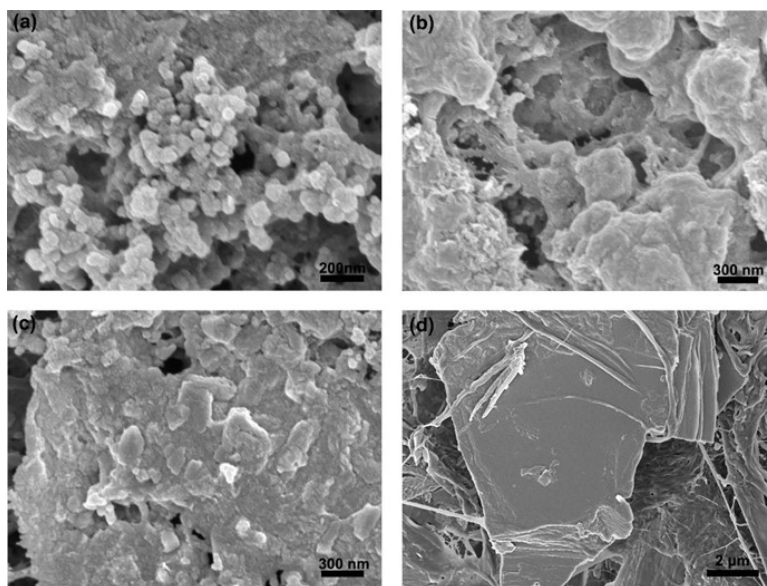

**Figure S11.** SEM images of MnS/C electrode after cycling. (a) 1st, (b) 2 nd, (c) 20 th, (d) 1000 th.

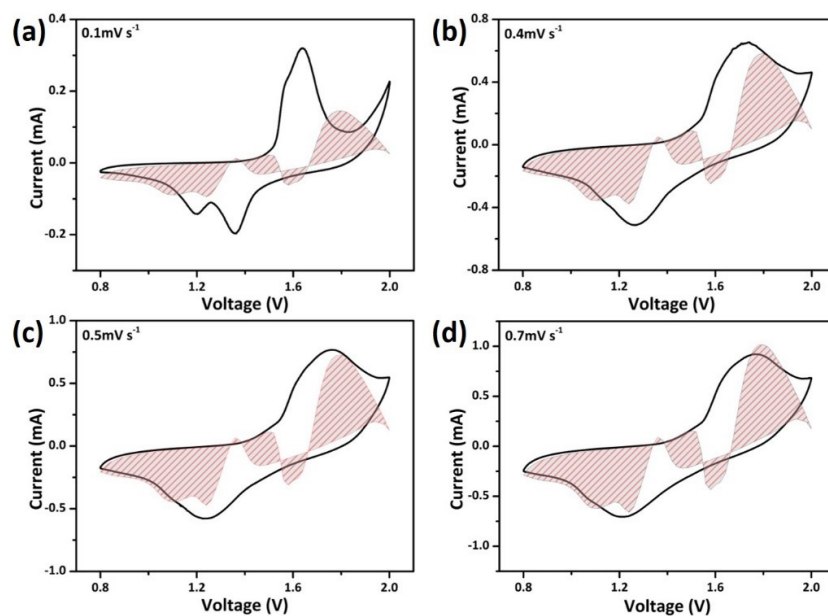

**Figure S12.** The capacitive contribution ratio of MnS/C at different scan rates: (a) 0.1, (b) 0.4, (c) 0.5, and (d) 0.7 mV s<sup>-1</sup>.

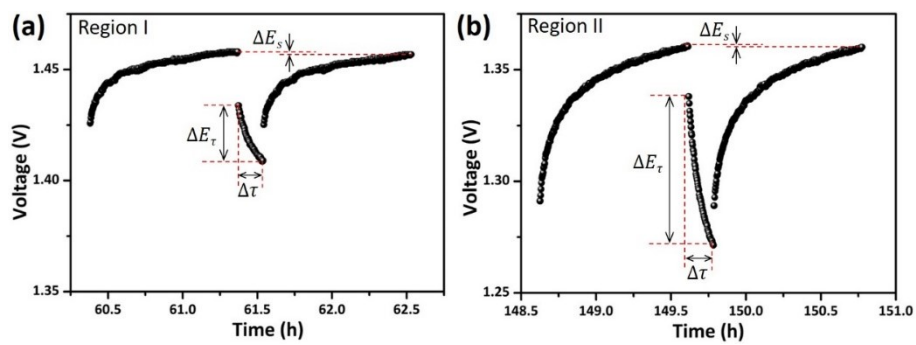

**Figure S13.** The typical voltage evolution in a single titration in region (a) I and (b) II.
